# Supplementary material for: Biosynthesis of Multicomponent Nanoparticles with Extract of Mortiño (Vaccinium floribundum Kunth) Berry: Application on Heavy Metals Removal from Water and Immobilization in Soils
Source: Hindawi journal article supplement (doi:10.1155/2018/9504807), 2018-01-01
Supplement: f1 [file 9504807.f1.docx]

**Supplementary Material**

Table S1. The chemical and physical properties of soil without treatment

| Property | Unit | Value |
| --- | --- | --- |
| Chemical | | |
| pH |  | 6.58 |
| Cation exchange capacity | meq/100g | 3.40 |
| Organic matter | % | 4.55 |
| Physical | | |
| Sand | % | 72.22 |
| Clay | % | 27.77 |
| Heavy metals | | |
| Cadmium | mg/kg | 8.75 |
| Copper | mg/kg | 346.20 |
| Chromium | mg/kg | 29.60 |
| Manganese | mg/kg | 348.00 |
| Nickel | mg/kg | 3.43 |
| Zinc | mg/kg | 419.00 |

This table shows the physical-chemical properties of a soil sample brought from the mining contaminated area.
